# Supplementary material for: Straightforward synthesis of a triazine-based porous carbon with high gas-uptake capacities
Source: Royal Society of Chemistry journal article supplement (doi:10.1039/c4ta02073a), 2014-07-01
Supplement: c4ta02073a1.pdf [file c4ta02073a1.pdf]

**Electronic Supplementary Information**

**Straightforward synthesis of a triazine-based porous carbon with high gas-uptake capacities**

Xin-Ming Hu,<sup>a,b</sup> Qi Chen,<sup>a</sup> Yan-Chao Zhao,<sup>a</sup> Bo W. Laursen,<sup>b</sup> Bao-Hang

Han<sup>\*a</sup>

<sup>a</sup> *National Center for Nanoscience and Technology, Beijing 100190, China*

*Tel: +86 10 8254 5576. Email: [hanbh@nanoctr.cn](mailto:hanbh@nanoctr.cn)*

<sup>b</sup> *Nano-Science Center and Department of Chemistry, University of Copenhagen, Universitetsparken 5, DK-2100 København Ø, Denmark*

**Table S1.** Elemental analysis of TPC-1.

| Sample                     | C     | N     | F              | H    | C/N  |
|----------------------------|-------|-------|----------------|------|------|
| Monomer <sup>a</sup> (wt%) | 48.02 | 14.00 | 37.98          | 0    | 3.43 |
| TPC-1 (wt%)                | 60.54 | 20.87 | 0 <sup>b</sup> | 2.23 | 2.90 |

<sup>a</sup> Theoretical value of the monomer; <sup>b</sup> deduced by XPS, EDX and <sup>19</sup>F NMR analysis.

**Table S2.** Porosity properties of TPC-1.

| Material | $S_{\text{BET}}$<br>(m <sup>2</sup> g <sup>-1</sup> ) <sup>a</sup> | $S_{\text{micro}}$<br>(m <sup>2</sup> g <sup>-1</sup> ) <sup>b</sup> | $S_{\text{micro}}/$<br>$S_{\text{BET}}$ | $V_{\text{total}}$<br>(cm <sup>3</sup> g <sup>-1</sup> ) <sup>c</sup> | $V_{\text{micro}}$<br>(cm <sup>3</sup> g <sup>-1</sup> ) <sup>d</sup> | $V_{\text{micro}}/$<br>$V_{\text{total}}$ | $D_{\text{pore}}$<br>(nm) <sup>e</sup> |
|----------|--------------------------------------------------------------------|----------------------------------------------------------------------|-----------------------------------------|-----------------------------------------------------------------------|-----------------------------------------------------------------------|-------------------------------------------|----------------------------------------|
| TPC-1    | 1940                                                               | 800                                                                  | 0.41                                    | 1.23                                                                  | 0.36                                                                  | 0.29                                      | 0.63                                   |

<sup>a</sup> Specific surface area calculated from the nitrogen adsorption isotherm using the BET method at the relative pressure ranging from 0.05 to 0.2. <sup>b</sup> Micropore surface area calculated from the nitrogen adsorption isotherm using the *t*-plot method. <sup>c</sup> Total pore volume at  $P/P_0 = 0.97$ . <sup>d</sup> Micropore volume calculated from the nitrogen adsorption isotherm using the *t*-plot method. <sup>e</sup> Dominant pore size determined by the nonlocal density functional theory (NLDFT) method.

**Table S3.** Summary of CO<sub>2</sub>/N<sub>2</sub> adsorption selectivity for various nitrogen-containing adsorbents.

| Porous materials             |                                                    | CO <sub>2</sub> /N <sub>2</sub> selectivity <sup>a</sup> | References          |
|------------------------------|----------------------------------------------------|----------------------------------------------------------|---------------------|
| Porous carbon materials      | TPC-1                                              | 38                                                       | This work           |
|                              | NC-800                                             | 21.6                                                     | <a href="#">S1</a>  |
|                              | NPC-650                                            | 23.4                                                     | <a href="#">S2</a>  |
|                              | HCM-DAH-1                                          | 28 <sup>b</sup>                                          | <a href="#">S3</a>  |
|                              | PIF6                                               | 58.9 <sup>b</sup>                                        | <a href="#">S4</a>  |
| Porous organic polymers      | PCTF-7                                             | 22                                                       | <a href="#">S5</a>  |
|                              | PI-1                                               | 27 <sup>b</sup>                                          | <a href="#">S6</a>  |
|                              | ALP-3                                              | 43                                                       | <a href="#">S7</a>  |
|                              | PECONF-1                                           | 109                                                      | <a href="#">S8</a>  |
|                              | BILP-2                                             | 113                                                      | <a href="#">S9</a>  |
| Porous coordination polymers | rht-type MOF (1) cobalt-imidazolate framework (2') | 34.3                                                     | <a href="#">S10</a> |
|                              |                                                    | 59                                                       | <a href="#">S11</a> |
|                              | Bio-MOF-11                                         | 81                                                       | <a href="#">S12</a> |
|                              | CAU-1                                              | 101                                                      | <a href="#">S13</a> |

<sup>a</sup> These data are estimated from the ratio of initial slopes of CO<sub>2</sub> and N<sub>2</sub> adsorption isotherms at 273 K unless stated otherwise; <sup>b</sup> data obtained at 298 K.

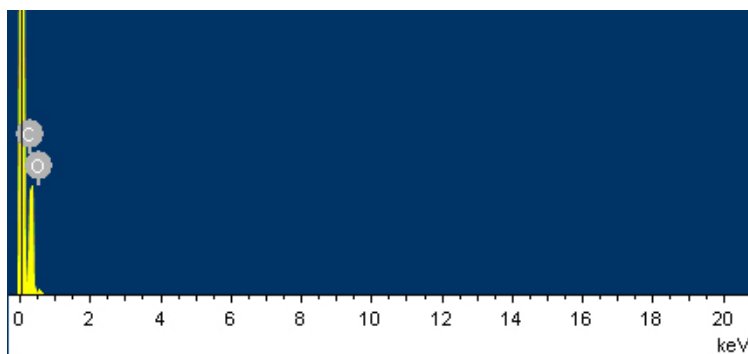

**Figure S1.** EDX spectrum of TPC-1: Zn (around 1.0 keV) or Cl (around 2.6 and 8.6 keV) signal from  $\text{ZnCl}_2$  is not observed.<sup>S14</sup>

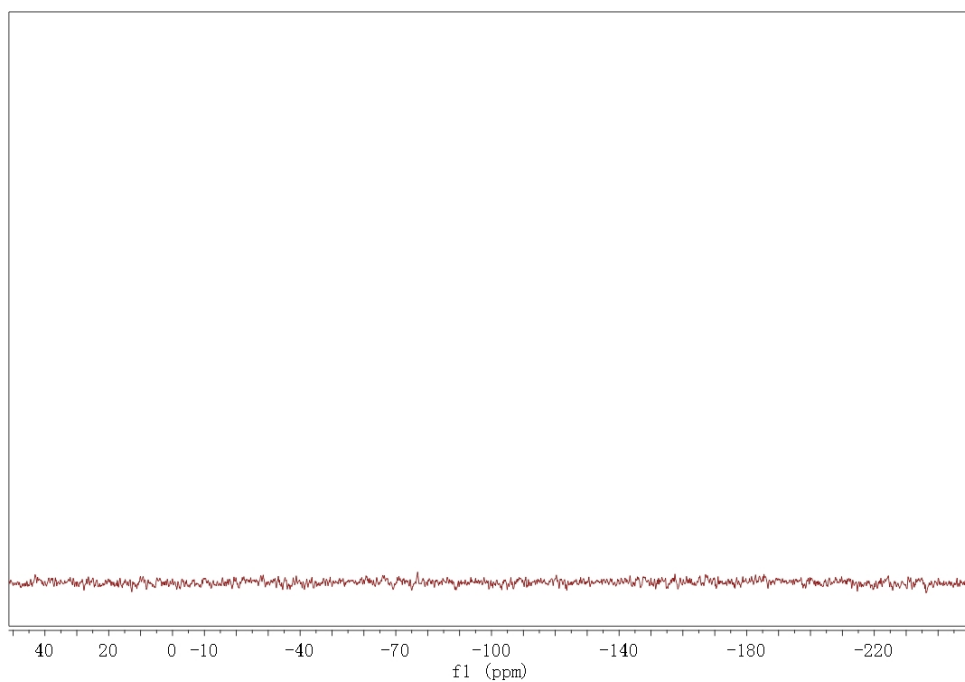

**Figure S2.** Solid state CP/MAS  $^{19}\text{F}$  NMR spectrum of TPC-1. Original F signal (around -147 ppm) is not observed.<sup>S15</sup>

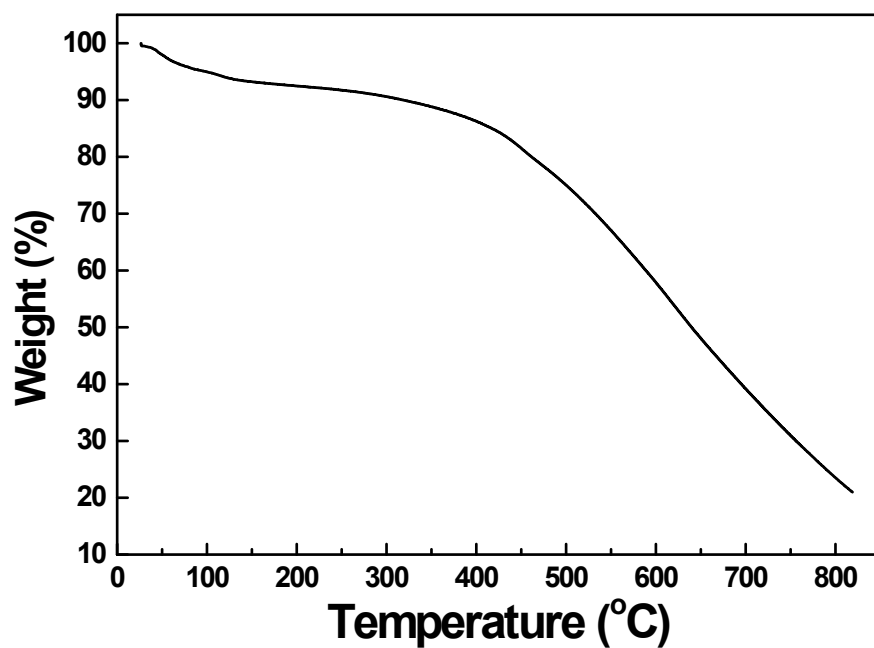

Figure S3. TGA curve of TPC-1.

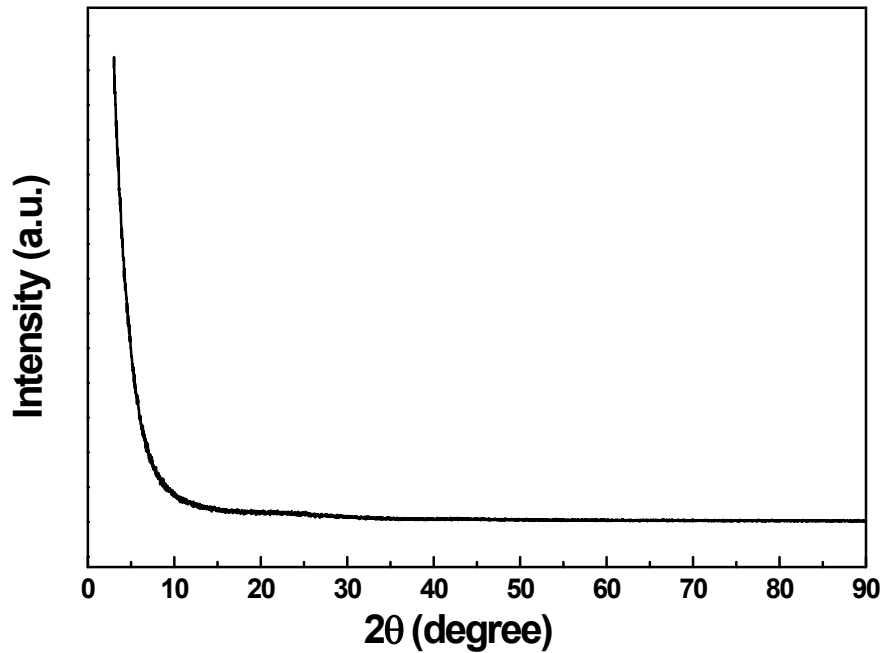

Figure S4. XRD pattern of TPC-1.

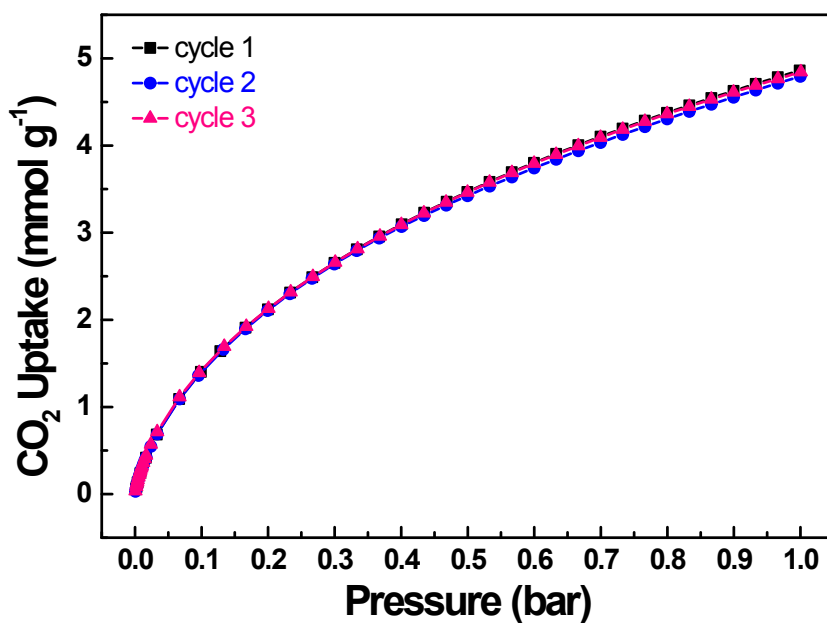

Figure S5. Cycles of CO<sub>2</sub> adsorption for TPC-1 at 273 K.

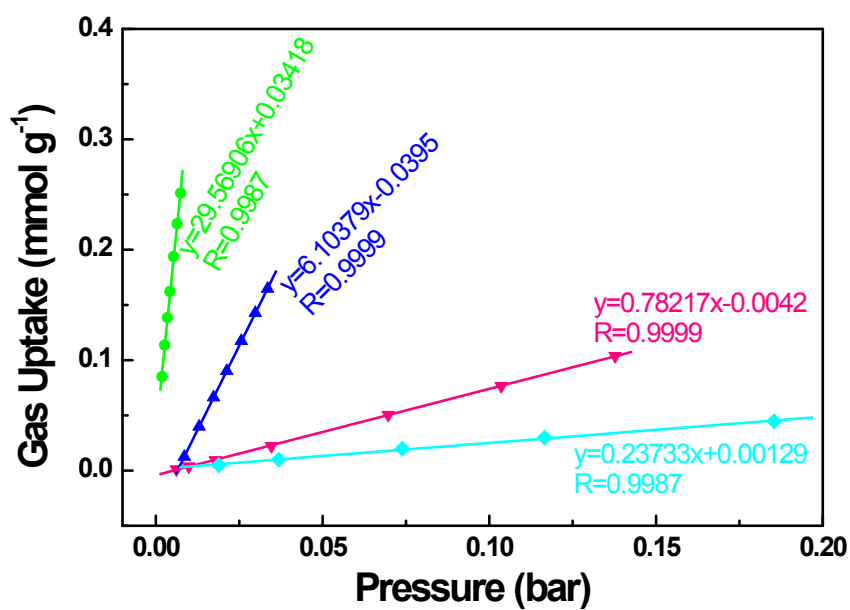

Figure S6. Initial slopes from CO<sub>2</sub> (green circle), CH<sub>4</sub> (blue up-triangle), N<sub>2</sub> (pink down-triangle), and H<sub>2</sub> (cyan diamond) adsorption isotherms at 273 K and low pressure region for TPC-1.

## References

- S1 J. Wang, I. Senkovska, M. Oschatz, M. R. Lohe, L. Borchardt, A. Heerwig, Q. Liu and S. Kaskel, *ACS Appl. Mater. Interfaces*, 2013, **5**, 3160–3167.
- S2 J. Wang, I. Senkovska, M. Oschatz, M. R. Lohe, L. Borchardt, A. Heerwig, Q. Liu and S. Kaskel, *J. Mater. Chem. A*, 2013, **1**, 10951–10961.
- S3 G.-P. Hao, W.-C. Li, D. Qian, G.-H. Wang, W.-P. Zhang, T. Zhang, A.-Q. Wang, F. Schüth, H.-J. Bongard and A.-H. Lu, *J. Am. Chem. Soc.*, 2011, **133**, 11378–11388.
- S4 M. Saleh, J. N. Tiwari, K. C. Kemp, M. Yousuf and K. S. Kim, *Environ. Sci. Technol.*, 2013, **47**, 5467–5473.
- S5 A. Bhunia, I. Boldog, A. Möller and C. Janiak, *J. Mater. Chem. A*, 2013, **1**, 14990–14999.
- S6 A. Laybourn, R. Dawson, R. Clowes, J. A. Iggo, A. I. Cooper, Y. Z. Khimiyak and D. J. Adams, *Polym. Chem.*, 2012, **3**, 533–537.
- S7 P. Arab, M. G. Rabbani, A. K. Sekizkardes, T. Islamoğlu and H. M. El-Kaderi, *Chem. Mater.*, 2014, **26**, 1385–1392.
- S8 P. Mohanty, L. D. Kull and K. Landskron, *Nat. Commun.*, 2011, **2**, 401.
- S9 M. G. Rabbani and H. M. El-Kaderi, *Chem. Mater.*, 2012, **24**, 1511–1517.
- S10 B. Zheng, Z. Yang, J. Bai, Y. Lia and S. Li, *Chem. Commun.*, 2012, **48**, 7025–7027.
- S11 S.-S. Chen, M. Chen, S. Takamizawa, P. Wang, G.-C. Lv and W.-Y. Sun, *Chem. Commun.*, 2011, **47**, 4902–4904.
- S12 J. An, S. J. Geib and N. L. Rosi, *J. Am. Chem. Soc.*, 2010, **132**, 38–39.
- S13 X. Si, C. Jiao, F. Li, J. Zhang, S. Wang, S. Liu, Z. Li, L. Sun, F. Xu, Z. Gabelica and C. Schick, *Energy Environ. Sci.*, 2011, **4**, 4522–4527.
- S14 P. Kuhn, A. Thomas and M. Antonietti, *Macromolecules*, 2009, **42**, 319–326.
- S15 D.-P. Liu, Q. Chen, Y.-C. Zhao, L.-M. Zhang, A.-D. Qi and B.-H. Han, *ACS Macro Lett.*, 2013, **2**, 522–526.
